# Supplementary material for: Loading ceftriaxone, vancomycin, and Bifidobacteria bifidum TMC3115 to neonatal mice could differently and consequently affect intestinal microbiota and immunity in adulthood
Source: PubMed Central journal article supplement (PMC6397183; doi:10.1038/s41598-018-35737-1), 2019-03-01
Supplement: 41598_2018_35737_MOESM1_ESM.pdf [file 41598_2018_35737_MOESM1_ESM.pdf]

## Supplementary information

**Loading ceftriaxone, vancomycin, and *Bifidobacteria bifidum* TMC3115 to neonatal mice could differently and consequently affect intestinal microbiota and immunity in adulthood**

**RuYue Cheng<sup>1</sup>, JiaWen Guo<sup>1</sup>, FangFang Pu<sup>1</sup>, ChaoMin Wan<sup>2</sup>, Lei Shi<sup>3</sup>, Huawen Li<sup>4</sup>, YuHong Yang<sup>4</sup>, ChengYu Huang<sup>1</sup>, Ming Li<sup>\*\*1</sup>, Fang He<sup>\*1</sup>**

<sup>1</sup>Department of Nutrition, Food Hygiene and Toxicology, West China School of Public Health and Healthy Food Evaluation Research Center, Sichuan University, 610041 Chengdu, Sichuan, PR China

<sup>2</sup>Department of Pediatrics of Western China Second Hospital of Sichuan University, Key Laboratory of Birth Defects and Related Diseases of Women and Children, 610041, Chengdu, Sichuan, PR China

<sup>3</sup>Department of Clinical Nutrition, West China Hospital, Sichuan University, 610041 Chengdu, Sichuan, PR China

<sup>4</sup> Hebei Inatural Biotech Co., Ltd. 050000 Shijiazhuang, Hebei, PR China.

\*Correspondence:

**Fang He**

E-mail: [hf18602880124@163.com](mailto:hfl8602880124@163.com)

\*\*Co- Correspondence:

**Ming Li**

E-mail: [ldmancheng@163.com](mailto:ldmancheng@163.com)

**Funding information:** National Natural Science Foundation of China (Grant number 81372982).

Table S1 Growth rate of mice at PND 28 and PND35

| Group          | PND28/21               | PND35/21                |
|----------------|------------------------|-------------------------|
| Control        | 1.22093±0.049172697 a  | 1.754654±0.056296959 a  |
| Ceftriaxone    | 1.227212±0.028876946 a | 1.550802±0.051420144 bc |
| Vancomycin     | 1.281697±0.024769572 a | 1.737158±0.07036476 ab  |
| TMC3115        | 1.300216±0.052911482 a | 1.688636±0.096658585 ab |
| Ceftri+TMC3115 | 0.995577±0.02582756 b  | 1.436436±0.057417893 c  |
| Vanco+TMC3115  | 1.068182±0.026875634 b | 1.492862±0.05819838 c   |

Fold changes of murine body weight at PND28 and 35 verse PND21 were calculated and taken as growth rate (n=12/group). Data are expressed as mean ± standard error of the mean. Mean values not sharing a letter are significantly different. N, number; TMC3115, *Bifidobacterium bifidum* TMC3115; Ceftri, Ceftriaxone; Vanco, Vancomycin. PND, postnatal day.

Table S2 Top 10 predominant bacteria in different groups at genus level

PND21

| Rank | Control                          | Ceftriaxone                       | Vancomycin                      | TMC3115                          | Ceftri+TMC3115                   | Vanco+TMC3115                    |
|------|----------------------------------|-----------------------------------|---------------------------------|----------------------------------|----------------------------------|----------------------------------|
| 1    | <i>Bacteroides</i><br>55.29%     | <i>Staphylococcus</i><br>35.14%   | <i>Lactobacillus</i><br>94.36%  | <i>Bacteroides</i><br>57.78%     | <i>Enterococcus</i><br>78.04%    | <i>Lactobacillus</i><br>96.29%   |
| 2    | <i>Lactobacillus</i><br>31.8%    | <i>Enterococcus</i><br>18.91%     | <i>Enterobacter</i><br>3.64%    | <i>[Prevotella]</i><br>16.34%    | <i>Bifidobacterium</i><br>12.74% | <i>Enterobacter</i><br>2.07%     |
| 3    | <i>Parabacteroides</i><br>6.46%  | <i>Rummeliibacillus</i><br>16.55% | <i>Pseudomonas</i><br>0.82%     | <i>Parabacteroides</i><br>11.32% | <i>Rummeliibacillus</i><br>3.14% | <i>Bifidobacterium</i><br>0.42%  |
| 4    | <i>[Prevotella]</i><br>1.99%     | <i>Acinetobacter</i><br>9.45%     | <i>Klebsiella</i><br>0.48%      | <i>Lactobacillus</i><br>5.86%    | <i>Staphylococcus</i><br>1.68%   | <i>Others</i><br>0.24%           |
| 5    | <i>Anaeroplasma</i><br>1.5%      | <i>Stenotrophomonas</i><br>5.91%  | <i>Others</i><br>0.28%          | <i>Odoribacter</i><br>2.85%      | <i>Others</i><br>1.21%           | <i>Acinetobacter</i><br>0.2%     |
| 6    | <i>Stenotrophomonas</i><br>1.28% | <i>Others</i><br>3.88%            | <i>Bacteroides</i><br>0.14%     | <i>Oscillospira</i><br>1.21%     | <i>Stenotrophomonas</i><br>1.01% | <i>Stenotrophomonas</i><br>0.18% |
| 7    | <i>Enterococcus</i><br>0.95%     | <i>Vibrio</i><br>2.51%            | <i>Enterococcus</i><br>0.13%    | <i>Prevotella</i><br>1.13%       | <i>Vagococcus</i><br>0.74%       | <i>Klebsiella</i><br>0.16%       |
| 8    | <i>Others</i><br>0.25%           | <i>Arthrobacter</i><br>1.64%      | <i>Bifidobacterium</i><br>0.03% | <i>Helicobacter</i><br>0.96%     | <i>Wautersiella</i><br>0.54%     | <i>Pseudomonas</i><br>0.1%       |
| 9    | <i>Oscillospira</i><br>0.11%     | <i>Lactobacillus</i><br>1.22%     | <i>Parabacteroides</i><br>0.03% | <i>AF12</i><br>0.7%              | <i>Acinetobacter</i><br>0.44%    | <i>Bacteroides</i><br>0.08%      |
| 10   | <i>Prevotella</i>                | <i>Bacteroides</i>                | <i>[Prevotella]</i>             | <i>Others</i>                    | <i>Bacteroides/Lactobacillus</i> | <i>Wautersiella</i>              |

0.11%

1.21%

0.03%

0.49%

0.12%

0.07%

The percentage is the mean relative abundance of different genera. n=4/group. TMC3115, *Bifidobacterium bifidum* TMC3115; Ceftri, Ceftriaxone; Vanco, Vancomycin; PND, postnatal day.

Table S3 Top 10 predominant bacteria in different groups at genus level

PND56

| Rank | Control                          | Ceftriaxone                      | Vancomycin                     | TMC3115                         | Ceftri+TMC3115                  | Vanco+TMC3115                    |
|------|----------------------------------|----------------------------------|--------------------------------|---------------------------------|---------------------------------|----------------------------------|
| 1    | <i>Bacteroides</i><br>36.3%      | <i>Bacteroides</i><br>38.41%     | <i>Oscillospira</i><br>23.91%  | <i>Bacteroides</i><br>31.73%    | <i>Bacteroides</i><br>66.4%     | <i>Bacteroides</i><br>61.28%     |
| 2    | <i>[Prevotella]</i><br>13.72%    | <i>Oscillospira</i><br>18.98%    | <i>Lactobacillus</i><br>23.27% | <i>Oscillospira</i><br>21.67%   | <i>Parabacteroides</i><br>13.2% | <i>Parabacteroides</i><br>22.65% |
| 3    | <i>Lactobacillus</i><br>12.86%   | <i>Parabacteroides</i><br>14.71% | <i>Mucispirillum</i><br>9.86%  | <i>Lactobacillus</i><br>9.55%   | <i>Akkermansia</i><br>5.46%     | <i>Akkermansia</i><br>7.78%      |
| 4    | <i>Parabacteroides</i><br>11.97% | <i>Akkermansia</i><br>11.33%     | <i>Ruminococcus</i><br>7.93%   | <i>[Prevotella]</i><br>7.32%    | <i>[Prevotella]</i><br>4.57%    | <i>Trabulsiella</i><br>1.8%      |
| 5    | <i>Prevotella</i><br>5.38%       | <i>[Prevotella]</i><br>6.63%     | <i>Bacteroides</i><br>6.97%    | <i>Ruminococcus</i><br>6.14%    | <i>Lactobacillus</i><br>3.2%    | <i>Oscillospira</i><br>1.7%      |
| 6    | <i>Oscillospira</i><br>4.91%     | <i>Desulfovibrio</i><br>2.5%     | <i>Helicobacter</i><br>6.36%   | <i>Parabacteroides</i><br>3.09% | <i>Sutterella</i><br>1.6%       | <i>Blautia</i><br>1.55%          |
| 7    | <i>Helicobacter</i><br>2.06%     | <i>Bilophila</i><br>2.26%        | <i>[Prevotella]</i><br>5.77%   | <i>Bilophila</i><br>2.61%       | <i>Oscillospira</i><br>1.36%    | <i>Klebsiella</i><br>0.16%       |
| 8    | <i>Odoribacter</i>               | <i>Ruminococcus</i>              | <i>Bilophila</i>               | <i>Odoribacter</i>              | <i>Helicobacter</i>             | <i>Bilophila</i>                 |

|    |                    |                        |                         |                        |                     |                     |
|----|--------------------|------------------------|-------------------------|------------------------|---------------------|---------------------|
|    | 1.95%              | 1.55%                  | 2.87%                   | 2.05%                  | 1.13%               | 0.82%               |
| 9  | <i>Sutterella</i>  | <i>Dehalobacterium</i> | <i>Adlercreutzia</i>    | <i>Coprococcus</i>     | <i>Trabulsiella</i> | <i>Enterobacter</i> |
|    | 1.4%               | 0.79%                  | 1.88%                   | 1.93%                  | 1.02%               | 0.64%               |
| 10 | <i>Akkermansia</i> | <i>Coprococcus</i>     | [ <i>Ruminococcus</i> ] | <i>Dehalobacterium</i> | <i>Blautia</i>      | <i>Helicobacter</i> |
|    | 1.34%              | 0.71%                  | 1.69%                   | 1.88%                  | 0.65%               | 0.59%               |

The percentage is the mean relative abundance of different genera. n=4/group. TMC3115, *Bifidobacterium bifidum* TMC3115; Ceftri, Ceftriaxone; Vanco, Vancomycin; PND, postnatal day.

Table S4 Short chain fatty acids in cecal contents of mice at PND 56

| SCFAs ( $\mu\text{g/g}$ ) | Control              | Ceftriaxone          | Vancomycin           | TMC3115              | Ceftri+TMC3115       | Vanco+TMC3115        |
|---------------------------|----------------------|----------------------|----------------------|----------------------|----------------------|----------------------|
| Acetic acid               | 1167.38 $\pm$ 465.87 | 1217.62 $\pm$ 410.50 | 1057.22 $\pm$ 127.36 | 1284.02 $\pm$ 281.19 | 1677.28 $\pm$ 875.18 | 1124.22 $\pm$ 260.79 |
| Propionic acid            | 495.46 $\pm$ 170.90  | 412.92 $\pm$ 124.93  | 405.22 $\pm$ 145.91  | 497.97 $\pm$ 144.25  | 657.53 $\pm$ 313.52  | 657.53 $\pm$ 313.52  |
| Isobutyric acid           | 68.50 $\pm$ 31.34    | 65.60 $\pm$ 18.55    | 69.77 $\pm$ 13.55    | 71.89 $\pm$ 17.17    | 60.53 $\pm$ 16.70    | 41.65 $\pm$ 5.63     |
| Butyric acid              | 858.63 $\pm$ 552.98  | 1075.77 $\pm$ 895.05 | 858.63 $\pm$ 552.98  | 665.60 $\pm$ 181.71  | 325.51 $\pm$ 130.00  | 188.55 $\pm$ 46.06   |
| Isovaleric acid           | 51.49 $\pm$ 26.04    | 49.54 $\pm$ 21.04    | 54.80 $\pm$ 15.85    | 51.93 $\pm$ 14.21    | 38.94 $\pm$ 12.66    | 38.24 $\pm$ 8.14     |
| Valeric acid              | 134.85 $\pm$ 37.53   | 85.53 $\pm$ 89.12    | 106.26 $\pm$ 26.83   | 87.44 $\pm$ 18.03    | 2.5 $\pm$ 0.42       | ND                   |
| Caproic acid              | 2.92 $\pm$ 1.27      | 2.10 $\pm$ 1.51      | 2.21 $\pm$ 0.51      | 2.39 $\pm$ 1.64      | 0.62 $\pm$ 0.68      | 0.21 $\pm$ 0.10      |

n=4, per group. Data are expressed as mean  $\pm$  standard deviation (SD) of mean. SCFAs: short chain fatty acids; TMC3115, *Bifidobacterium bifidum* TMC3115; Ceftri, Ceftriaxone; Vanco, Vancomycin ; PND, postnatal day,  $\mu\text{g}$ : microgram; ND, not detected.

a

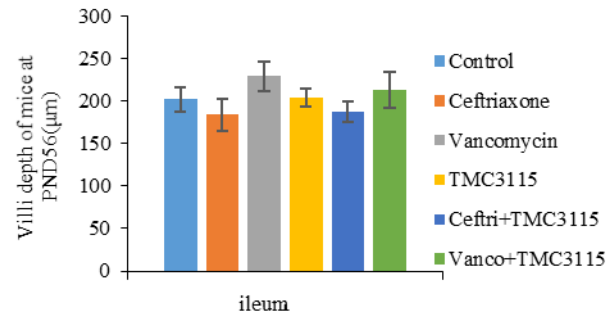

b

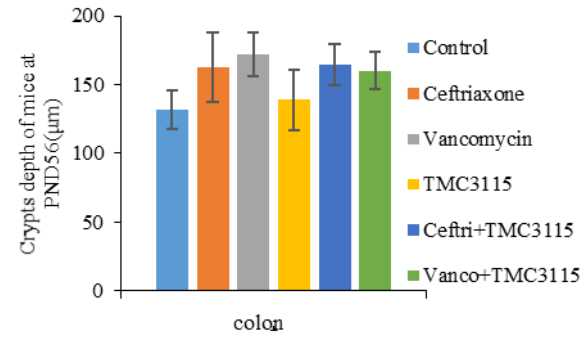

c

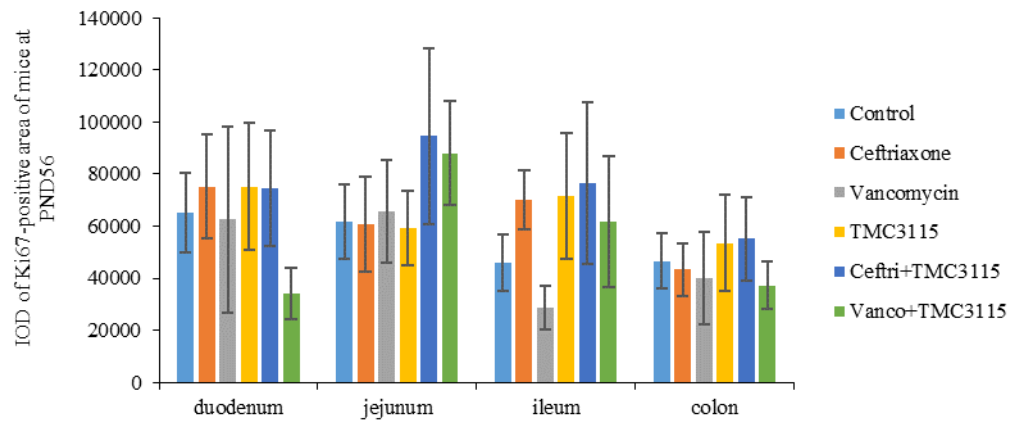

d

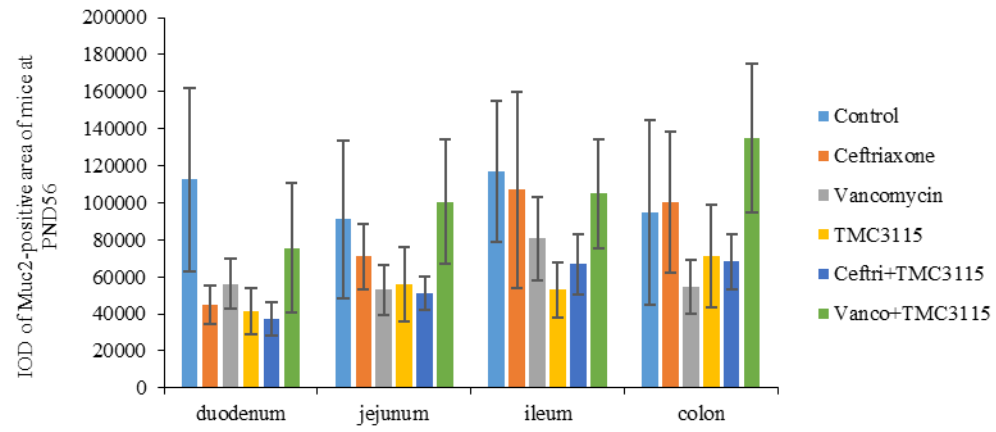

e

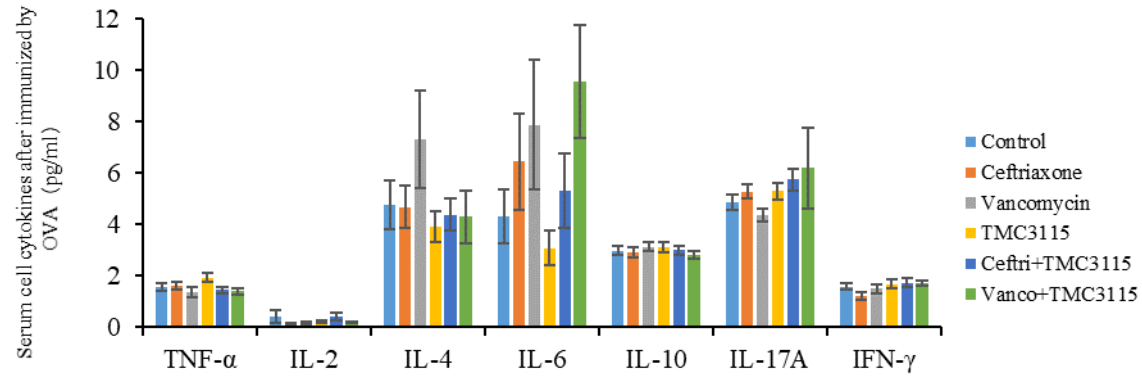

Fig.S1 Intestinal tissue injury of mice at PND56. (a) The depth of intestinal villi in ileum of mice at PND56 (n=12/group). (b) The depth of crypts in colon of mice at PND56 (n=12/group). (c) Ki67-positive area of the four intestinal segments (duodenum, jejunum, ileum, and colon) in mice at PND56. (d) Muc2-positive area of the four intestinal segments (duodenum, jejunum, ileum, and colon) in mice at PND56 (n=12/group). There was no significant difference between groups of the ileal villi depth, colonic crypts depth and the Ki67/Muc2-positive area of the four segments. IOD: integral optical density. (e) Serum cell cytokines of mice at PND56 (n=12/group). TMC3115, *Bifidobacterium bifidum* TMC3115; Ceftri, Ceftriaxone; Vanco, Vancomycin. PND, postnatal day.
